# Supplementary figures and images for: Synthetic Cannabinoids Induce Autophagy and Mitochondrial Apoptotic Pathways in Human Glioblastoma Cells Independently of Deficiency in TP53 or PTEN Tumor Suppressors
Source: MDPI journal article supplement (doi:10.3390/cancers13030419), 2021-01-22

Figure 4b

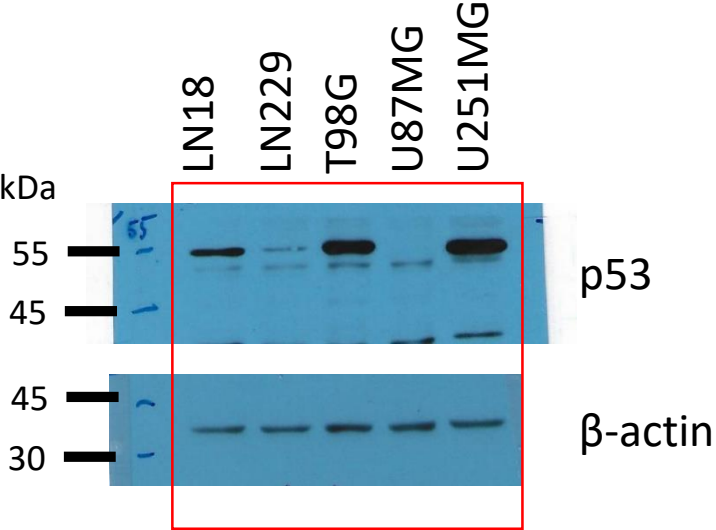

Figure 5b

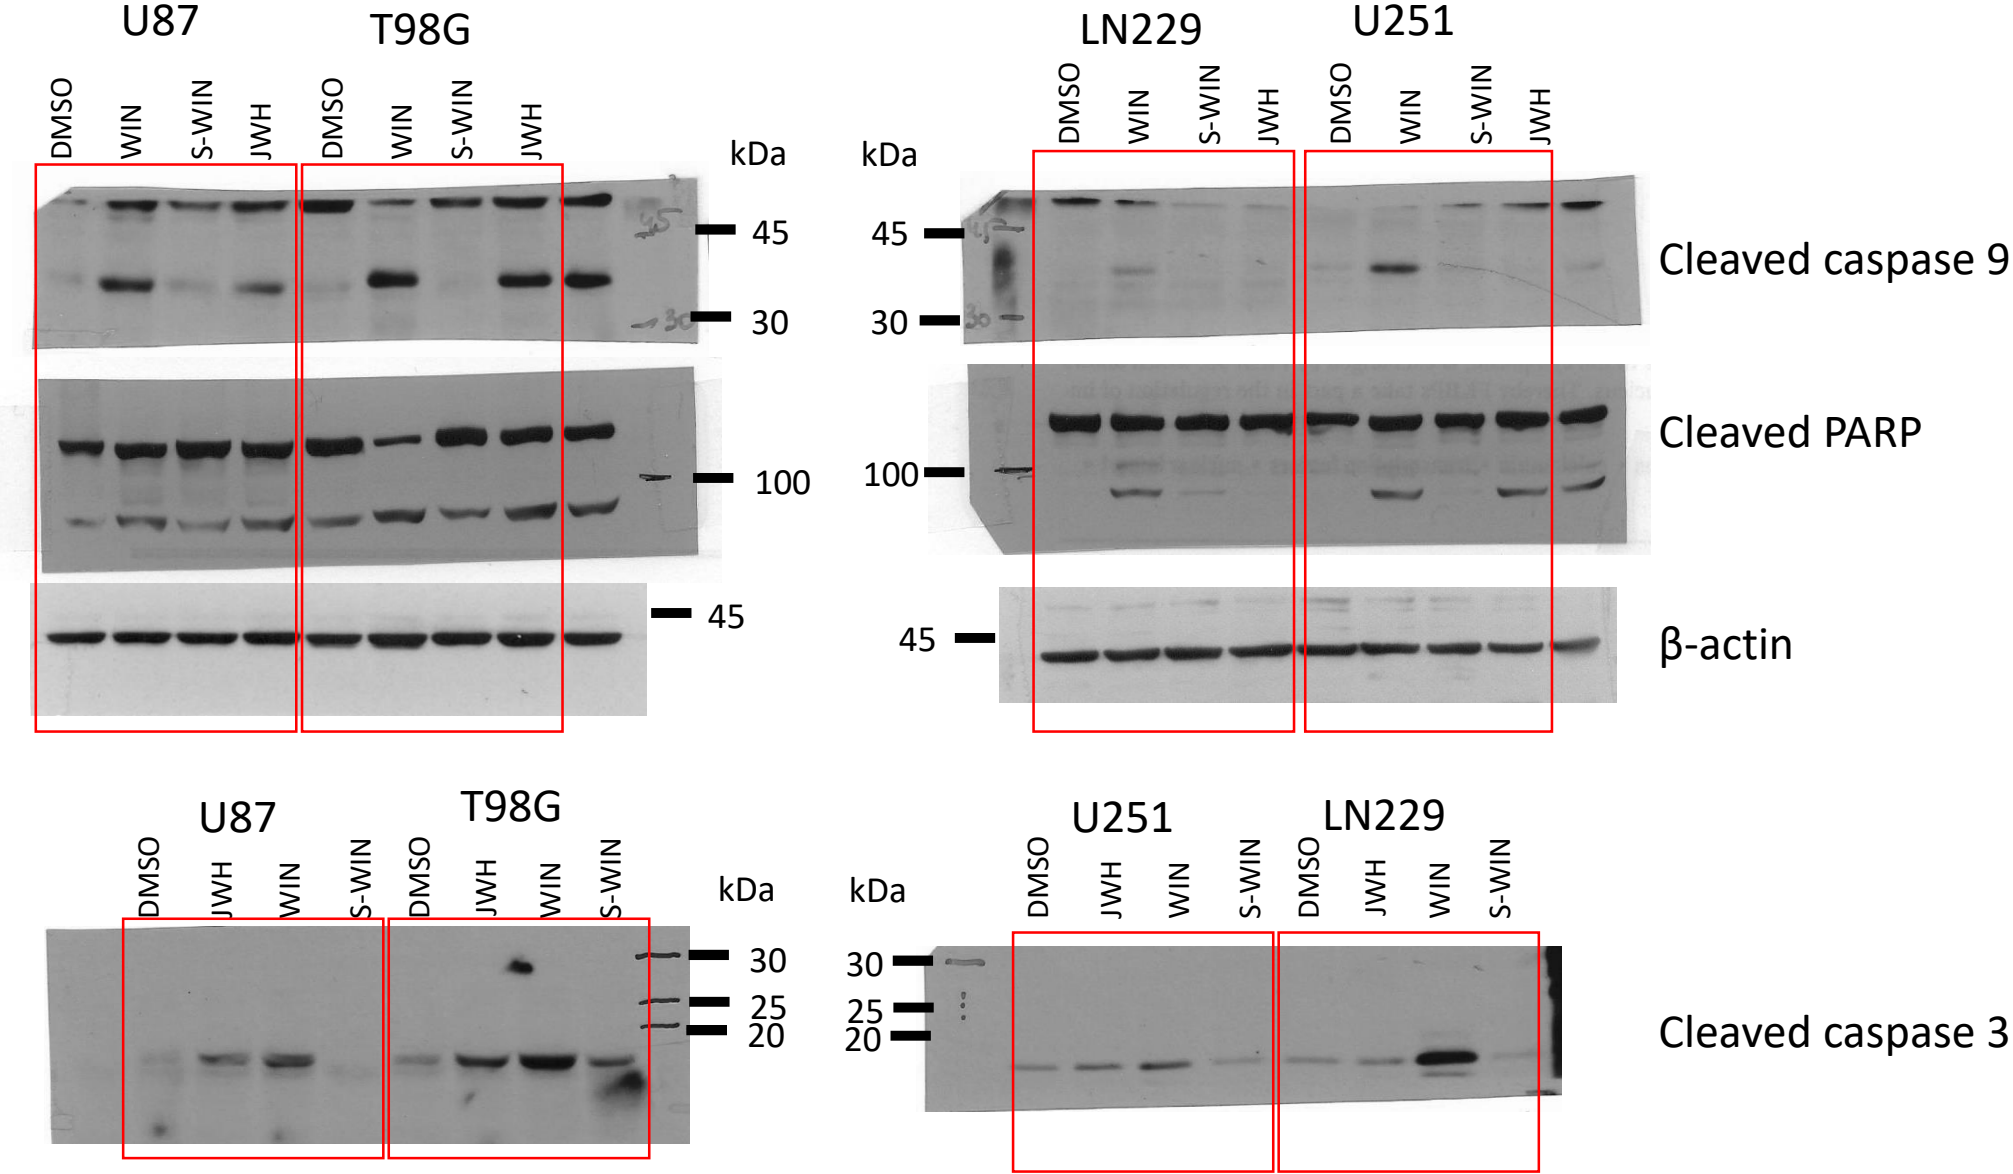

Figure 6d/e

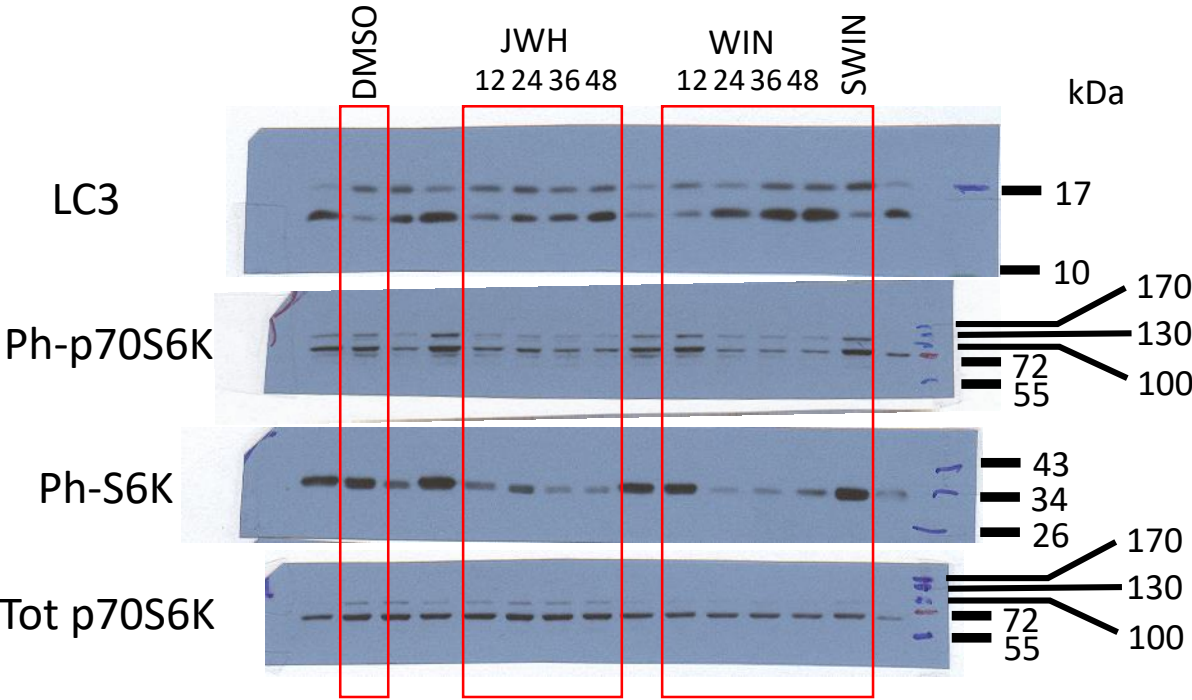

Figure 7

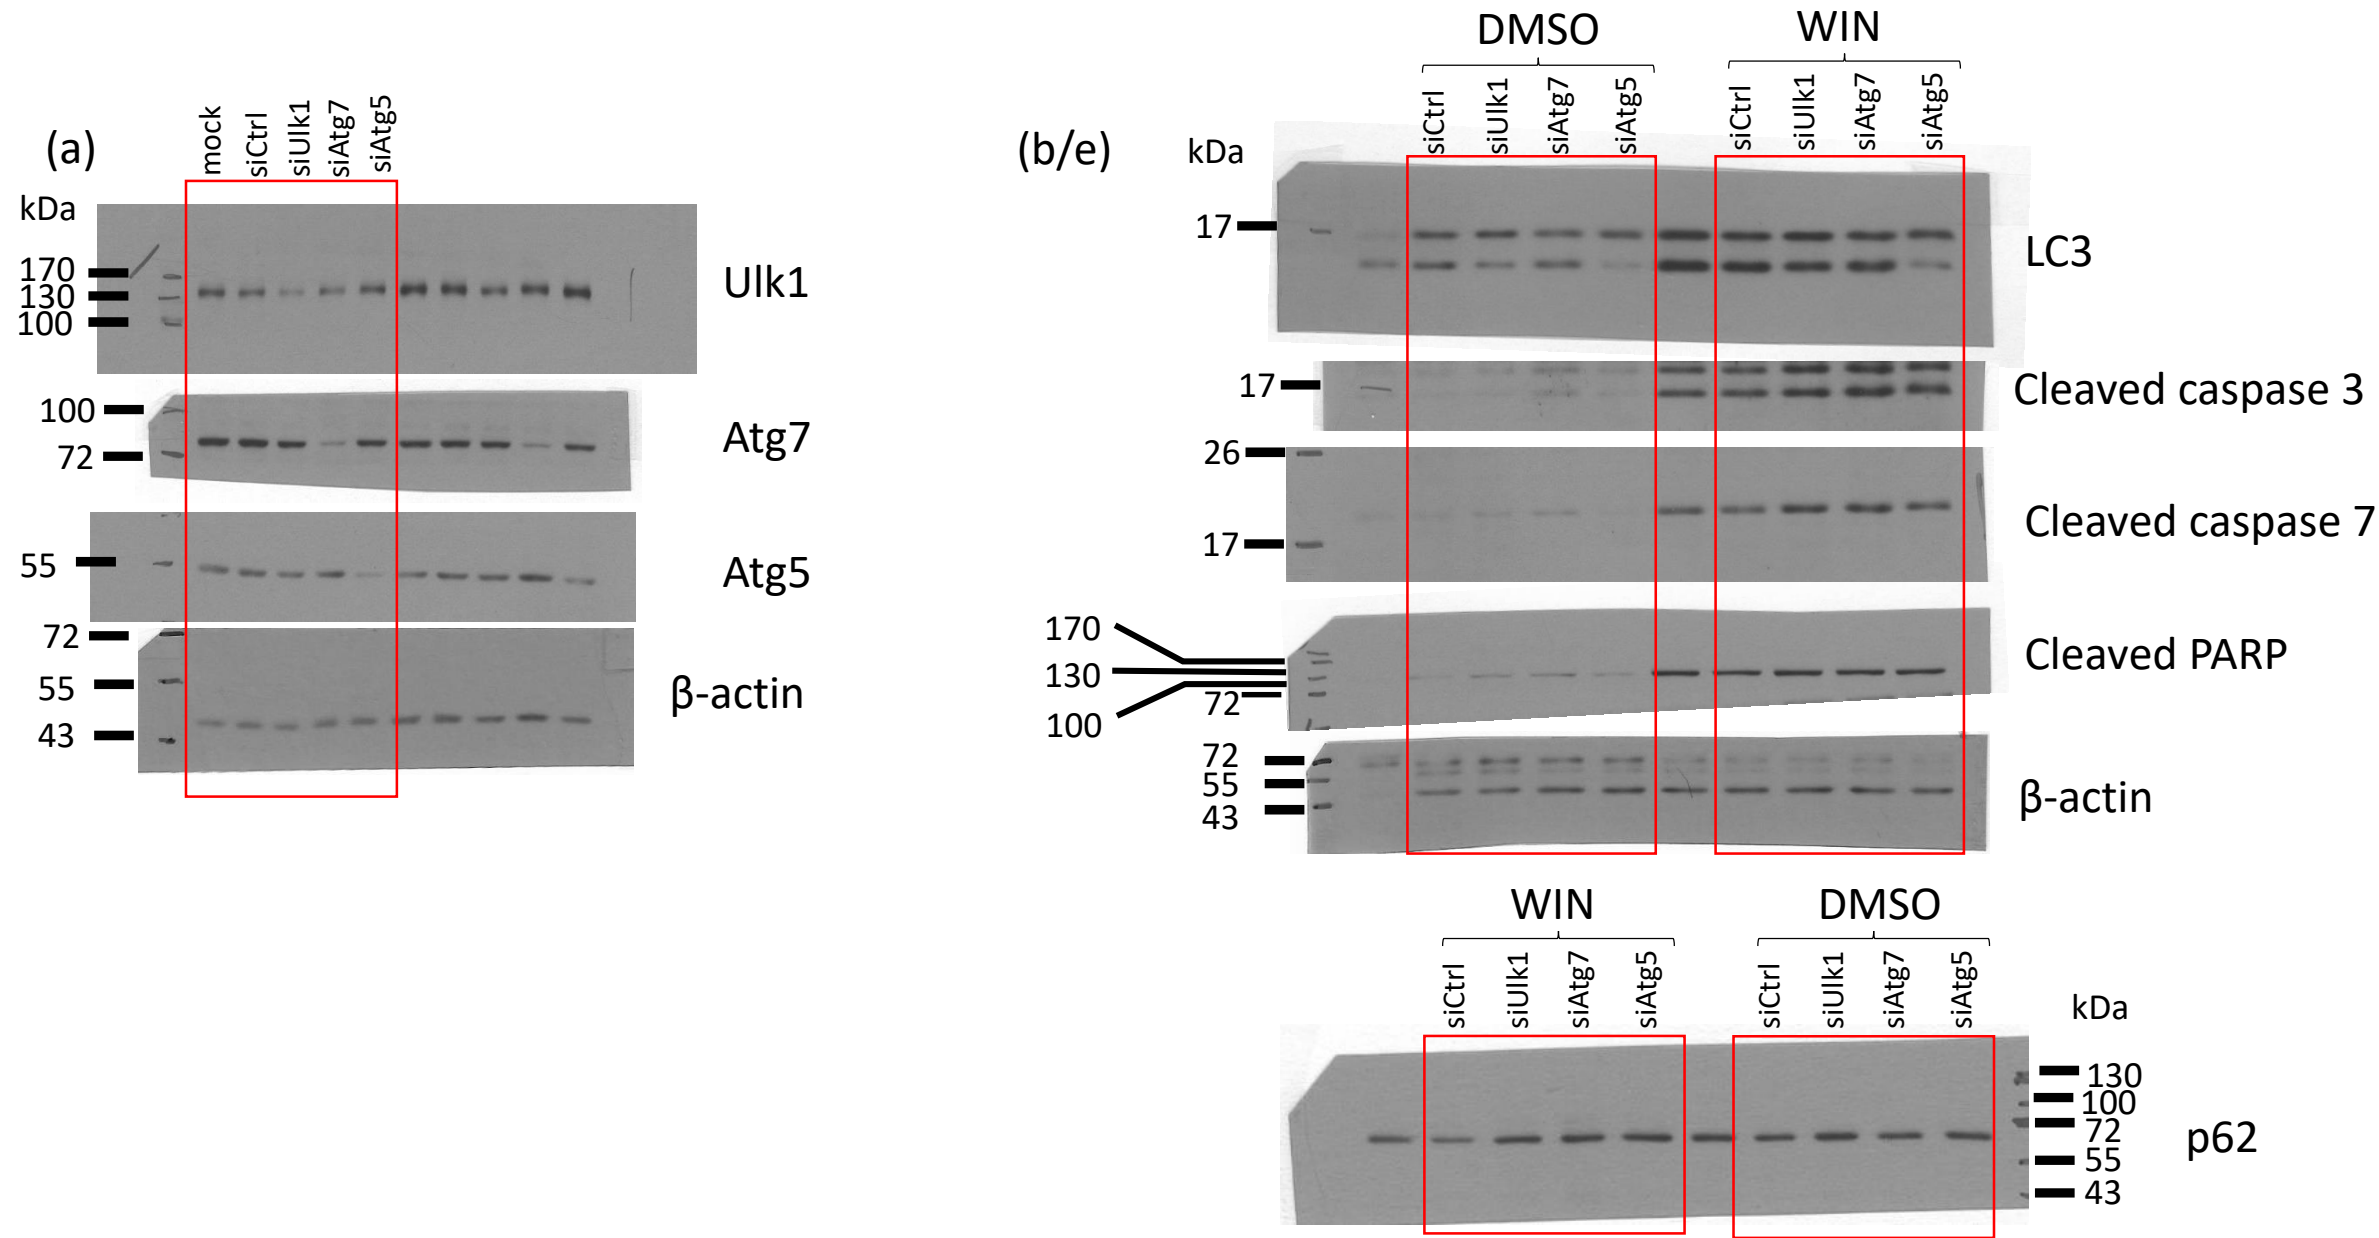

Suppl Figure 4

(a)

T98G

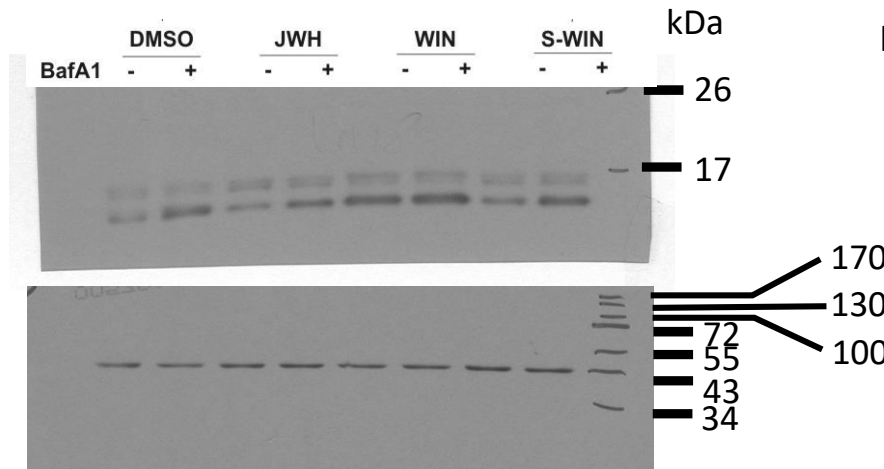

U87

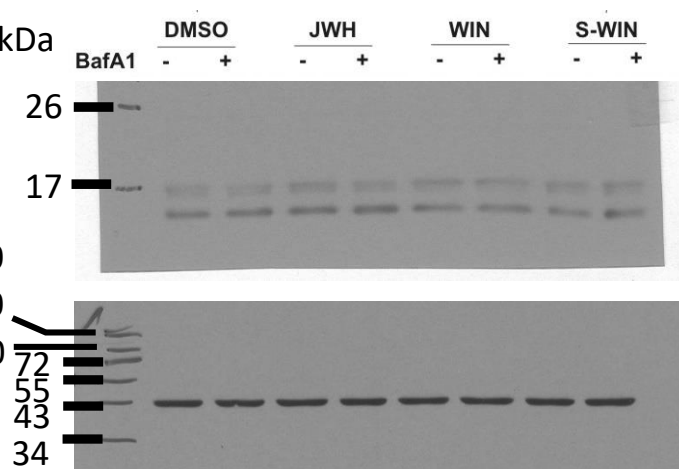

LN229

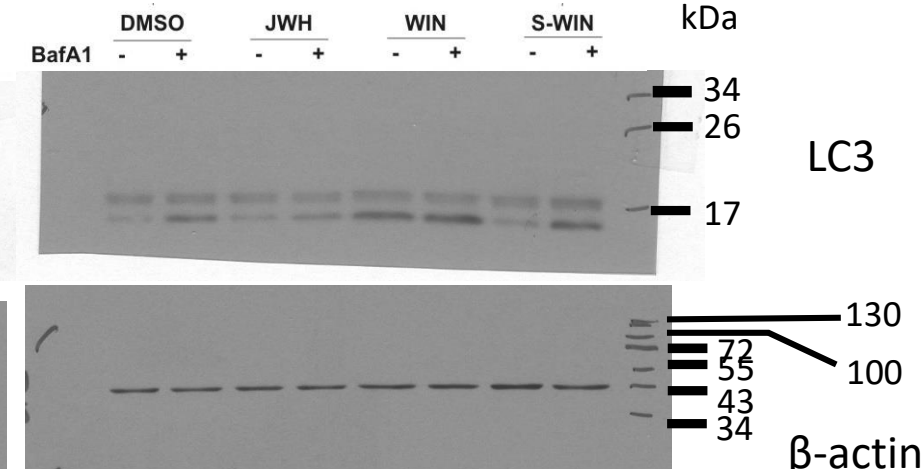

Suppl Figure 4 (continued)

(b)

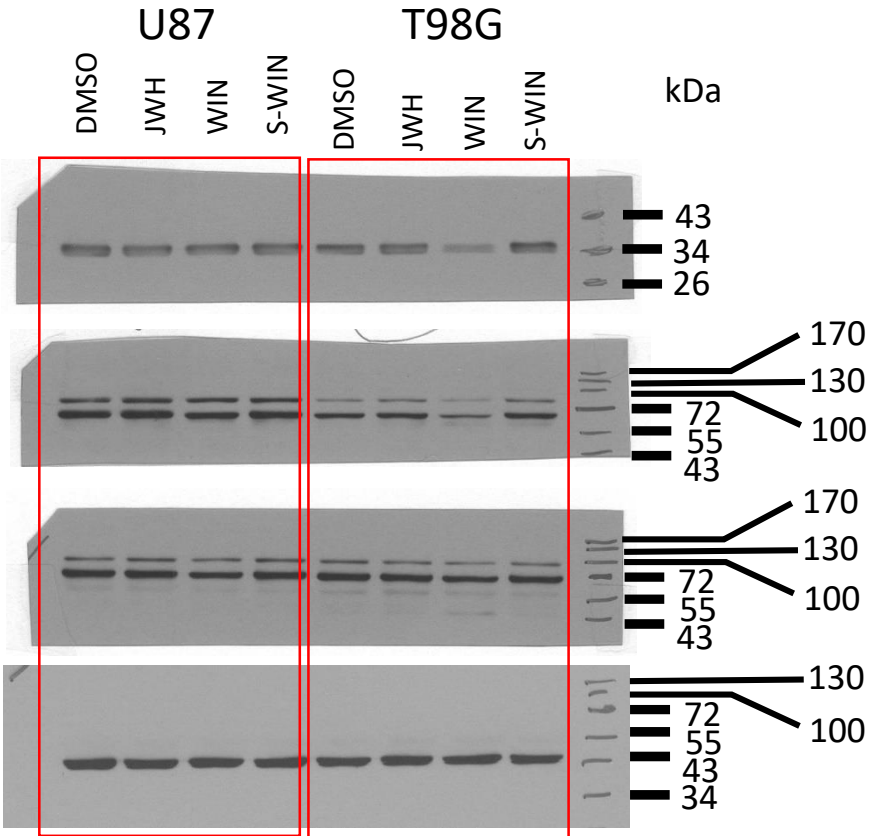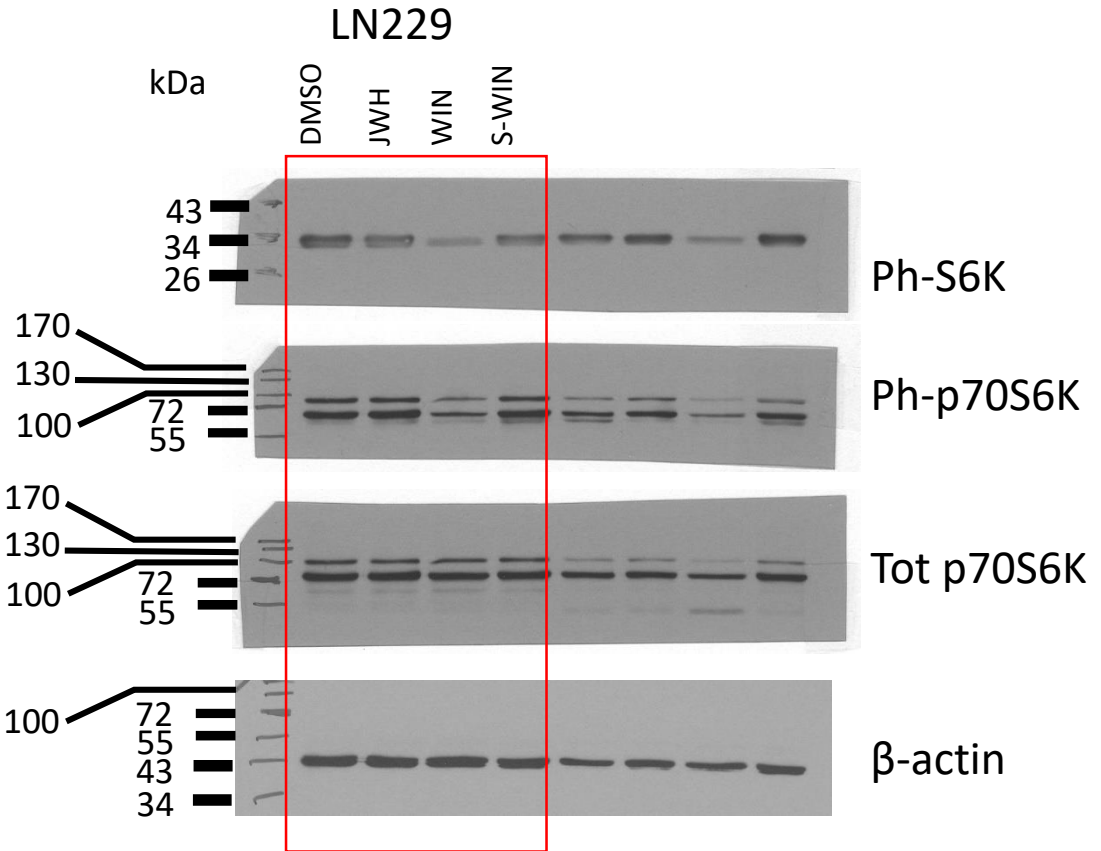

Supplement: s1 [file s1]
